# Supplementary material for: Post-Electric Current Treatment Approaching High-Performance Flexible n-Type Bi2Te3 Thin Films
Source: MDPI journal article supplement (doi:10.3390/mi13091544), 2022-09-17
Supplement: s1 [file s1]

# **Post-electric current treatment approaching high-performance flexible n-type Bi<sub>2</sub>Te<sub>3</sub> thin films**

Dongwei Ao <sup>1, #, \*</sup>, Wei-Di Liu <sup>2, #</sup>, Fan Ma <sup>3</sup>, Wenke Bao <sup>1</sup>, Yuexing Chen <sup>4</sup>

**Figure S1** Calculated crystallinity of 0.5 A - Bi<sub>2</sub>Te<sub>3</sub> f-TF.

**Figure S2** (a) The SEM images of 0.6 A - Bi<sub>2</sub>Te<sub>3</sub> thin film; (R-a) The repetitive SEM images of the 0.6 A - Bi<sub>2</sub>Te<sub>3</sub> thin film.

**Figure S3** The repetitive test of TE performance of the 0.5 A - Bi<sub>2</sub>Te<sub>3</sub> thin film.

**Figure S4** (a,b) The repetitive test result of the bending resistance of 0.5 A - Bi<sub>2</sub>Te<sub>3</sub> thin film at bending radius of 9 mm and bending cycle of 800, respectively.

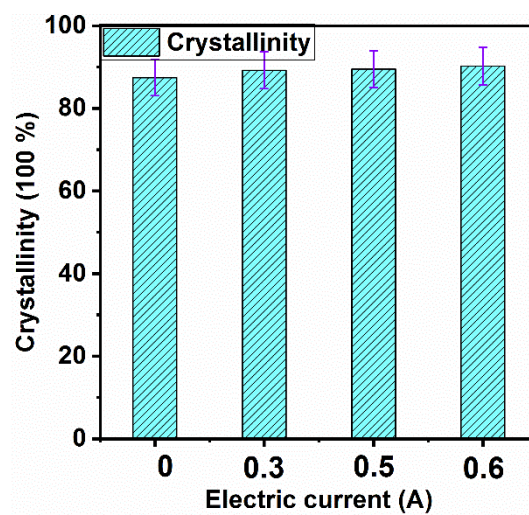

**Figure S1.** Calculated crystallinity of 0.5 A - Bi<sub>2</sub>Te<sub>3</sub> f-TF.

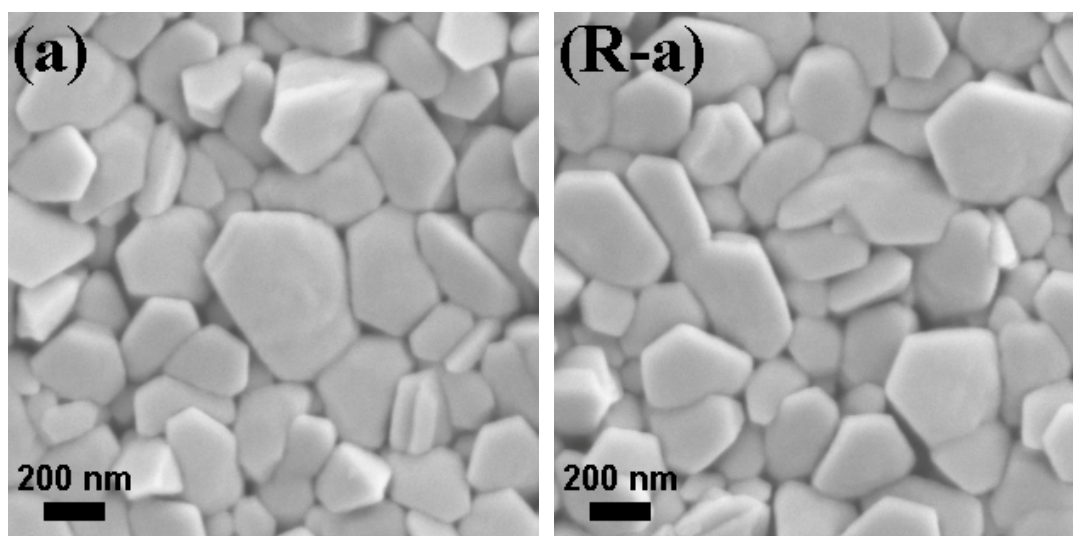

**Figure S2.** (a) The SEM images of 0.6 A -  $\text{Bi}_2\text{Te}_3$  thin film. (R-a) The repetitive SEM images of the 0.6 A -  $\text{Bi}_2\text{Te}_3$  thin film.

The repetitive SEM image was provided as shown in Figure R3. After 3 measure cycles and keep for a long time, the repetitive SEM images (**Figure S1b**) of the 0.6 A -  $\text{Bi}_2\text{Te}_3$  thin film is basically the same with the **Figure S1a**.

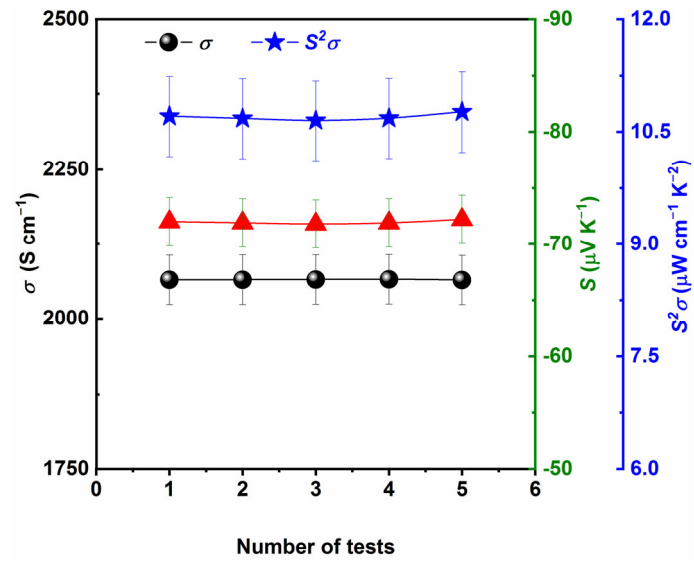

**Figure S3.** The repetitive test of TE performance of the 0.5 Å -  $\text{Bi}_2\text{Te}_3$  thin film.

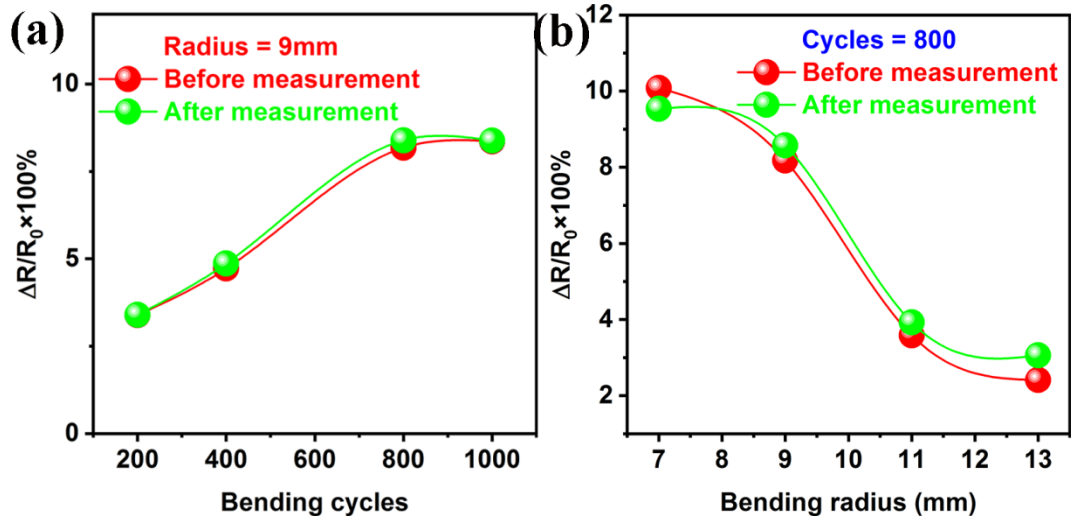

**Figure S4.** (a,b) The repetitive test result of the bending resistance of  $0.5 \text{ \AA}$  -  $\text{Bi}_2\text{Te}_3$  thin film at bending radius of 9 mm and bending cycle of 800, respectively.

In this work, the  $n_e$  of the thin films ranges from  $2.03 \times 10^{20}$  to  $3.84 \times 10^{20} \text{ cm}^{-3}$ , which is higher than that of bulk  $\text{Bi}_2\text{Te}_3$  ( $1\sim 9 \times 10^{19} \text{ cm}^{-3}$ ) [1-3], which is responsible for the low Seebeck coefficient of the thin films.

1. Zhu, B.; Liu, X.; Wang, Q.; Qiu, Y.; Shu, Z.; Guo, Z.; Tong, Y.; Cui, J.; Gu, M.; He, J. Q. Realizing record high performance in n-type  $\text{Bi}_2\text{Te}_3$ -based thermoelectric materials. *Energy Environ. Sci.*, 2020, 13, 2106.
2. Hao, F.; Xing, T.; Qiu, P.; Hu, P.; Wei, T.; Ren, D.; Shi, X.; Chen, L.; Enhanced Thermoelectric Performance in n-Type  $\text{Bi}_2\text{Te}_3$ -Based Alloys via Suppressing Intrinsic Excitation. *ACS Appl. Mater. Interfaces* 2018, 10, 21372–21380.
3. Shi, X. L.; Zou, J.; Chen, Z. G. Advanced Thermoelectric Design: From Materials and Structures to Devices. *Chem. Rev.* **2020**, 120, 7399-7515.
